# Supplementary material
Source: PubMed Central journal article supplement (PMC1617189)
Supplement: rsbl20050388s15.pdf [file rsbl20050388s15.pdf]

## ELECTRONIC SUPPLEMENTARY MATERIAL

### MATERIAL AND METHODS AND STATISTICAL DETAILS

In experiment 1, we measured the fractional absorption of  $^{14}\text{C}$  radiolabeled L-glucose ( $N=8$ ) following Karasov and Cork (1994). Tests with  $^{14}\text{C}$  labeled L-glucose find that it is absorbed by non-mediated pathways, not catabolized, excreted quantitatively, and nearly all (>90%) label remains on the mother compound (Chang *et al.* 2004). Fractional absorption (F) was calculated as:

$$F = (S \cdot P \cdot k_{el}) \cdot I^{-1} \quad (\text{eq. 1})$$

where S is the probe distribution space ( $\mu\text{l}$  plasma), P is the steady-state feeding concentration of  $^{14}\text{C}$  L-glucose in plasma ( $\text{dpm } \mu\text{l}^{-1}$ ),  $k_{el}$  is the elimination rate constant for L-glucose ( $\text{time}^{-1}$ ), and I is the label intake rate ( $\text{dpm } \text{time}^{-1}$ ). To obtain these parameters, we conducted two trials. In the first, we determined  $k_{el}$  and S by injecting birds in the pectoralis muscle with  $9.25 \times 10^4$  Bq of [ $1\text{-}^{14}\text{C}$ ]-L-glucose (Moravek Biochemicals, Brea, CA, USA) dissolved in 10-15  $\mu\text{l}$  of deionized water. We determined  $k_{el}$  as the exponent of exponential decay functions fitted to the relationship between the concentration of label in excreta and time (Hall *et al.* 1977; Karasov & Cork 1994) assuming that the label disappearance rate from plasma is matched by its rate of appearance in excreta (Hartman Bakken *et al.* 2004). Probe distribution space was determined in five birds by taking a single blood sample ( $\sim 10$   $\mu\text{l}$ ) by clipping a toenail 2-3 h post-injection, and using the  $k_{el}$  values obtained from excreta to calculate the theoretical time-zero plasma label concentration ( $A_i(0)$ ,  $\text{dpm } \mu\text{l}^{-1}$ ). In the second trial, birds were fed a 584 mM sucrose solution containing approximately  $1.83 \times 10^4$  Bq  $\text{ml}^{-1}$  of [ $1\text{-}^{14}\text{C}$ ]-L-glucose to determine P and I. Birds were allowed to feed for 2-3 h before a single blood sample was taken. Steady state feeding was verified by measuring food intake rate and label concentration in excreta for several hours after labeled food was presented.

Hummingbirds increase their food intake when the sugar concentration of their food decreases (Martínez del Río *et al.* 2001). To vary food intake rate in experiment 2, we fed birds 292 ( $N=5$ ) and 876 mM ( $N=4$ ) sucrose solutions containing approximately  $1.35 \times 10^4$  and  $2.37 \times 10^4$  Bq  $\text{ml}^{-1}$  of [ $1\text{-}^{14}\text{C}$ ]-L-glucose, respectively, and measured P and I as described for experiment 1. Because this experiment simply tested for a diet treatment effect, we assumed that S and  $k_{el}$

did not change with treatment. This was confirmed by finding that L-glucose distribution pool size and  $k_{el}$  for the same individual birds under the same treatments ( $T_a = 24 \pm 1$  °C, 292 and 876 mM sucrose diets) obtained in previous separate experiments (Hartman Bakken *et al.* 2004) did not differ significantly between diet treatments ( $F_{1,7} = 1.16$ ,  $p = 0.32$  and  $F_{1,7} = 1.99$ ,  $p = 0.2$ , respectively). Because the birds gained considerable body mass and significantly increased their body fat stores during the six months between the measurements done by Hartman Bakken *et al.* (2004) and those reported in the present study, we could not use these values to calculate L-glucose fractional absorption in experiment 2 directly.

Analysis of variance (ANOVA) or covariance (ANCOVA) were used to test for treatment and body size effects in experiment 2. Proportional data were arcsin(sqrt) transformed before analysis (Sokal & Rohlf 1995). In all other cases, we used linear models on non-transformed data to assess significance. Values are reported as mean  $\pm$  1 s.e.m.

- Chang, M. H., Chediack, J. G., Caviedes-Vidal, E. & Karasov, W. H. 2004 L-glucose absorption in house sparrows (*Passer domesticus*) is nonmediated. *Journal of Comparative Physiology B* **174**, 181-188.
- Hall, J. E., Guyton, A. C. & Farr, B. M. 1977 A single-injection method for measuring glomerular filtration rate. *American Journal of Physiology* **232**, F72-F76.
- Hartman Bakken, B., McWhorter, T. J., Tsahar, E. & Martínez del Rio, C. 2004 Hummingbirds arrest their kidneys at night: diel variation in glomerular filtration rate in *Selasphorus platycercus*. *Journal of Experimental Biology* **207**, 4383-4391.
- Karasov, W. H. & Cork, S. J. 1994 Glucose absorption by a nectarivorous bird: the passive pathway is paramount. *American Journal of Physiology* **267**, G16-G26.
- Martínez del Rio, C., Schondube, J. E., McWhorter, T. J. & Herrera, L. G. 2001 Intake responses in nectar feeding birds: digestive and metabolic causes, osmoregulatory consequences, and coevolutionary effects. *American Zoologist* **41**, 902-915.
- Sokal, R. R. & Rohlf, F. J. 1995. *Biometry*. New York: W.H. Freeman.
